## REVIEW

### Evolution of high duty cycle echolocation in bats

M. Brock Fenton<sup>1,\*</sup>, Paul A. Faure<sup>2</sup> and John M. Ratcliffe<sup>3</sup>

<sup>1</sup>Department of Biology, Western University, London, ON, Canada N6A 5B7, <sup>2</sup>Department of Psychology, Neuroscience & Behaviour, McMaster University, Hamilton, ON, Canada L8S 4K1 and <sup>3</sup>Institute of Biology, University of Southern Denmark, 5230 Odense M, Denmark

\*Author for correspondence (bfenton@uwo.ca)

#### Summary

**Duty cycle describes the relative ‘on time’ of a periodic signal. In bats, we argue that high duty cycle (HDC) echolocation was selected for and evolved from low duty cycle (LDC) echolocation because increasing call duty cycle enhanced the ability of echolocating bats to detect, lock onto and track fluttering insects. Most echolocators (most bats and all birds and odontocete cetaceans) use LDC echolocation, separating pulse and echo in time to avoid forward masking. They emit short duration, broadband, downward frequency modulated (FM) signals separated by relatively long periods of silence. In contrast, bats using HDC echolocation emit long duration, narrowband calls dominated by a single constant frequency (CF) separated by relatively short periods of silence. HDC bats separate pulse and echo in frequency by exploiting information contained in Doppler-shifted echoes arising from their movements relative to background objects and their prey. HDC echolocators are particularly sensitive to amplitude and frequency glints generated by the wings of fluttering insects. We hypothesize that narrowband/CF calls produced at high duty cycle, and combined with neurobiological specializations for processing Doppler-shifted echoes, were essential to the evolution of HDC echolocation because they allowed bats to detect, lock onto and track fluttering targets. This advantage was especially important in habitats with dense vegetation that produce overlapping, time-smeared echoes (i.e. background acoustic clutter). We make four specific, testable predictions arising from this hypothesis.**

Key words: Chiroptera, calling behaviour, signal design, Yinpterochiroptera, Yangochiroptera, flutter detection, Doppler shift compensation.

Received 2 April 2012; Accepted 14 May 2012

#### Introduction

Echolocation is an active sensory system that tightly couples signal production with echo reception. Echolocation has evolved independently in two orders of birds (Caprimulgiformes and Apodiformes) and four orders of mammals [Cetartiodactyla, Chiroptera, Eulipotyphla (Buchler, 1976); and Afrosoricida (Gould, 1965; Thomas et al., 2002)]. The ability to echolocate allows animals to orient in their environment (all echolocators) and detect prey (odontocete whales and laryngeally echolocating bats) in total darkness and other conditions of uncertain lighting (Griffin, 1944; Griffin, 1958). Using differences between pulse and echo, echolocators collect information and form an acoustic image of the environment.

Echolocation works best when the loud outgoing vocalizations do not mask or reduce the listener’s sensitivity to the weaker returning echoes (Jen and Suga, 1976; Suga and Schlegel, 1972; Fenton et al., 1995). Most echolocators avoid forward masking effects by separating pulse and echo in time; however, ~160 species of bats in the families Rhinolophidae and Hipposideridae and the mormoopid *Pteronotus parnellii* separate pulse and echo information in frequency. These different calling strategies correspond to low (LDC) and high duty cycle (HDC) echolocation, respectively.

The duty cycle (DC) of a periodic sound is the ratio of signal duration to signal period ( $DC=d/T$ ). Animals alter the duty cycle of their signals by changing their call duration ( $d$ , the time between the onset and offset of a sound) and/or period ( $T$ , the time between

the onset of successive sounds). Duty cycle describes the ‘on time’ of a sound relative to the interval of silence between sounds and is a measure of signalling effort.

Fig. 1 shows oscillograms and spectrograms of typical search phase echolocation calls to illustrate the difference in the temporal patterns of call emission for representative LDC and HDC species. Included are two Old World HDC bats (*Rhinolophus hipposideros*, *Hipposideros armiger*) and the one New World HDC bat (*P. parnellii*). Call duty cycle differs dramatically between the bats in these groups, ranging from 6.1% to 9.2% for the three LDC echolocators and from 34.7% to 56.3% for the three HDC echolocators (data in Table 1). Fig. 2 shows oscillograms, spectrograms and power spectra of single search phase echolocation calls from the temporal sequences in Fig. 1 to illustrate why signal duration, call structure (frequency modulated FM versus constant frequency CF) and/or signal bandwidth alone do not uniquely identify LDC from HDC echolocators. We include both spectrograms and oscillograms because the former usefully illustrate call frequency structure and the latter call duration.

LDC and HDC echolocation differ in a number of respects. Most bat species use an LDC calling strategy and avoid forward masking under most natural conditions (Kalko and Schnitzler, 1989). LDC bats typically do not broadcast calls and receive echoes concurrently. Rather, they produce a call and then listen for audible echoes before emitting another call (Holderied and von Helversen, 2003; Holderied et al., 2005). The outgoing calls of LDC echolocators are short in duration (typically 1–20 ms) and are

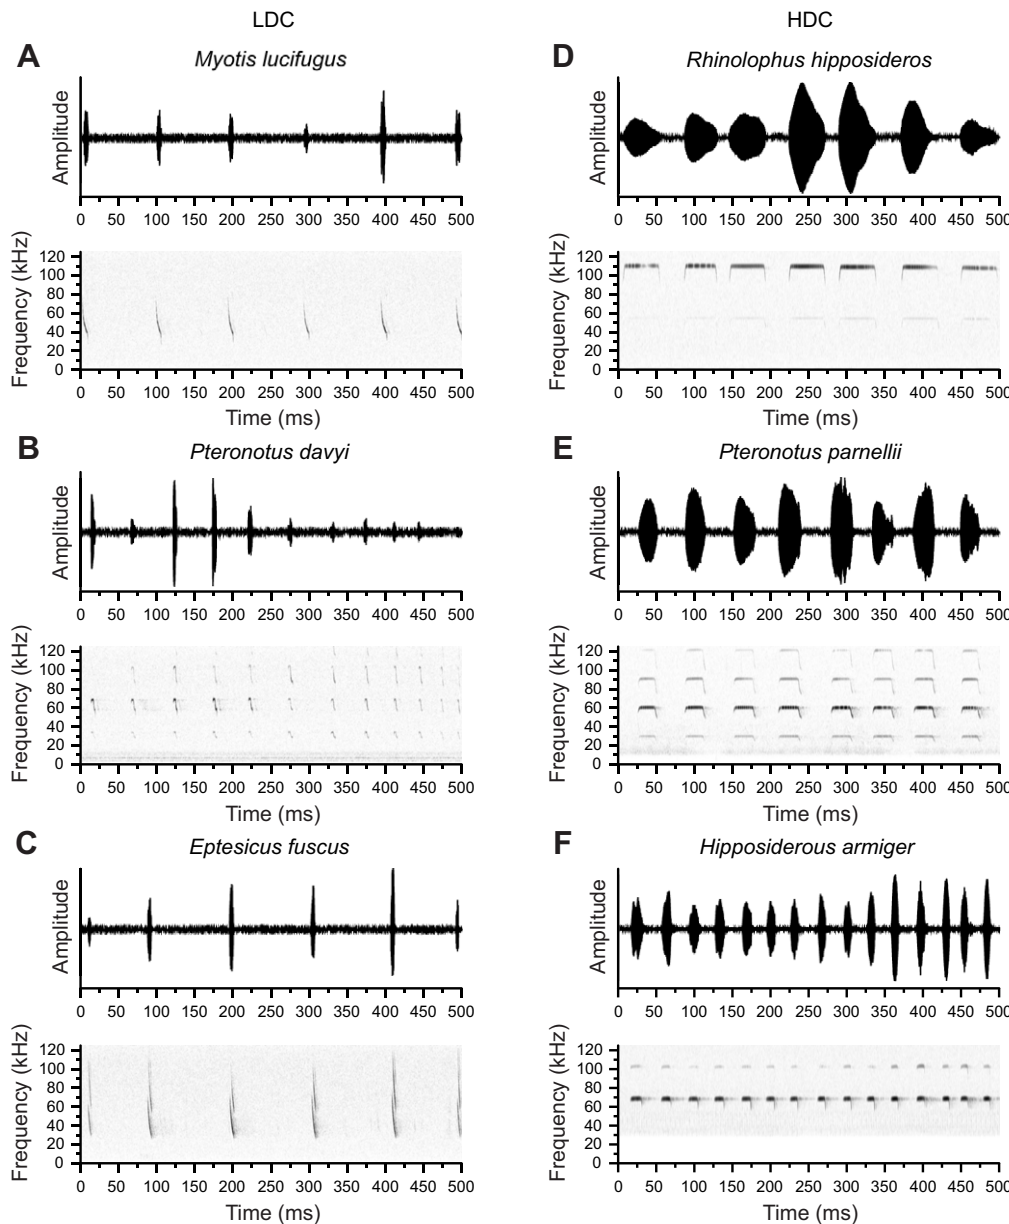

Fig. 1. Temporal pattern of biosonar call emission for low duty cycle (LDC) and high duty cycle (HDC) echolocators. Each panel shows an oscillogram (top) and spectrogram (bottom) and illustrates the typical temporal pattern of call emission during the search phase of echolocation. LDC species like *Myotis lucifugus* (A), *Pteronotus davyi* (B) and *Eptesicus fuscus* (C) emit short duration, broadband frequency modulated (FM) echolocation signals, whereas HDC species like *Rhinolophus hipposideros* (D), *Pteronotus parnellii* (E) and *Hipposideros armiger* (F) emit long duration, narrowband CF signals. Duty cycle data are presented in Table 1. Oscillogram signal amplitude is displayed in arbitrary units.

separated by long intervals of silence (Fig. 1A–C). For the purpose of this paper, we define LDC bats as those producing signals with a duration <25% of their signal period during the search phase of echolocation. Most LDC bats produce echolocation calls with their larynx, although a handful of species in the family Pteropodidae use tongue clicks (Griffin et al., 1958; Yovel et al., 2010).

HDC bats avoid auditory masking by separating pulse and echo in frequency, allowing them to broadcast calls and receive echoes at the same time (Schuller, 1974; Schuller, 1977). HDC bats take advantage of information contained in Doppler-shifted echoes generated by the relative movements of bat and target, including acoustic glints generated by the wingbeats of fluttering insects. Echolocation calls of HDC bats consist of a long CF component followed by a brief, downward FM sweep. In some species, the initial portion of the call also contains a short, upward FM sweep (Henson et al., 1987; Jones and Rayner, 1989). Narrowband calls of HDC bats are typically multi-harmonic with the highest signal energy in the second acoustic element (Pye and Roberts, 1970;

Schnitzler and Denzinger, 2011). HDC bats emit long duration calls (e.g. 10 to >50ms) relative to their call period (Fig. 1D–F). We operationally define HDC bats as those whose signal durations are  $\geq 25\%$  of their call periods during the search phase of echolocation. There are ~160 species of HDC echolocators, most of which are in the Old World families Rhinolophidae and Hipposideridae, and one species (*P. parnellii*) in the New World family Mormoopidae. Rhinolophids appear to be the most neurobiologically specialized HDC echolocators and hipposiderids the least specialized, with *P. parnellii* falling in between (Neuweiler, 1990). All HDC bats are laryngeal echolocators. Old World HDC echolocators typically emit sounds through their nostrils, whereas *P. parnellii* emits sounds through its mouth (Schnitzler and Denzinger, 2011). Both LDC and HDC species exhibit echo intensity compensation; that is, bats decrease the sound pressure level (SPL) of vocalizations to compensate for the increase in echo amplitude received during the approach to a target (Kick and Simmons, 1984; Kobler et al., 1985; Hiryu et al., 2008).

Aerial-hawking bats searching for flying insects emit a sequence of calls in which pulse duration decreases and the pulse repetition rate and duty cycle increase from the search to the approach to the terminal phases of hunting (Griffin et al., 1960; Simmons et al., 1979; Kalko et al., 1998). During feeding buzzes, LDC bats actively control the bandwidth and focus of their echolocation beam (Surlykke et al., 2009; Jakobsen and Surlykke, 2010). Furthermore, superfast muscles in the larynx are vital to the production of rapid call sequences during feeding buzzes (Elemans et al., 2011). While it is assumed that HDC echolocators also possess superfast laryngeal muscles (Elemans et al., 2011), it is unknown whether they also control their sonar beam width.

Here, we compare HDC and LDC bats and develop a hypothesis about the origin and evolution of HDC echolocation. We argue that the combination of acoustic and neurobiological specializations that evolved with HDC echolocation improved the ability of bats to detect, lock onto and track fluttering prey. We are not the first students to have arrived at this hypothesis for the evolution of HDC echolocation but, to the best of our knowledge, we are the first to make it explicit and provide a framework of testable predictions.

### HDC echolocation

HDC bats have a unique combination of four features. First, they emit echolocation calls with long durations relative to their signal period. Second, the peak call energy is concentrated into a narrow spectral band dominated by a CF component (Neuweiler, 1990; Jones, 1999). Third, the peripheral auditory system of HDC bats contains anatomical modifications in the cochlea and an overrepresentation of afferent neurons each tuned to a narrow frequency range centred on and slightly above the second harmonic of the CF echolocation call component (Pollak et al., 1972; Suga et al., 1976). This 'auditory fovea' results from mechanical specializations of the basilar membrane of the cochlea and a disproportionate representation of sharply tuned neurons at all levels of the central auditory system (Suga and Jen, 1976; Schuller and Pollack, 1979; Rübtsamen et al., 1988; Pollak and Casseday, 1989; Ostwald, 1984; Neuweiler, 1990). Fourth, HDC bats exhibit Doppler shift compensation, which involves lowering the frequency of the next outgoing echolocation call to compensate for the flight-induced Doppler-shifted increase in frequency of the previous call's echo (Schnitzler, 1973; Jen and Kamada, 1982). Details of this behaviour have been documented extensively in laboratory studies with both stationary and moving bats (e.g. free-flying bats recorded with stationary microphones or from bats placed at the end of a moving pendulum). A few studies have also managed to record outgoing biosonar vocalizations and the Doppler-shifted echoes that return to a flying bat by attaching a small microphone and radio transmitter to the head of the animal (Henson et al., 1987; Hiryu et al., 2005; Hiryu et al., 2008). Regardless of the technique, these studies confirm that flying bats adjust the frequency of their sonar emissions to correct for flight-induced Doppler-shifted echoes. Doppler shift compensation ensures the narrowband/CF echo remains centred on the auditory fovea (Schuller and Pollack, 1979; Schnitzler, 1970). Among HDC echolocators, hipposiderids perform less well at Doppler shift compensation than rhinolophids and *P. parnellii* (Habersetzer et al., 1984; Gaioni et al., 1990), perhaps because of the more broadly tuned auditory fovea in the hipposiderids (Schuller, 1980; Habersetzer et al., 1984; Moss and Schnitzler, 1995; Schnitzler and Denzinger, 2011).

The ability to extract information from Doppler-shifted echoes of fluttering insects allowed HDC bats to detect and continuously

Table 1. Call duration, period and duty cycle in laryngeally echolocating bats

| Family/Species                     | <i>d</i> (ms) | <i>T</i> (ms) | DC (%) | Strategy |
|------------------------------------|---------------|---------------|--------|----------|
| <b>Suborder Yinpterochiroptera</b> |               |               |        |          |
| Rhinopomatidae                     |               |               |        |          |
| <i>Rhinopoma hardwickei</i>        | 5.4           | 100.1         | 5.0    | LDC      |
| Hipposideridae                     |               |               |        |          |
| <i>Hipposideros armiger</i>        | 11.4          | 34.0          | 34.7   | HDC      |
| <i>Asellia tridens</i>             | 7.3           | 28.5          | 27.9   | HDC      |
| Rhinolophidae                      |               |               |        |          |
| <i>Rhinolophus blasi</i>           | 38.0          | 93.1          | 40.9   | HDC      |
| <i>Rhinolophus capensis</i>        | 31.2          | 68.9          | 45.3   | HDC      |
| <i>Rhinolophus clivosus</i>        | 27.3          | 58.2          | 46.9   | HDC      |
| <i>Rhinolophus euryale</i>         | 52.9          | 96.4          | 56.1   | HDC      |
| <i>Rhinolophus ferrumequinum</i>   | 53.4          | 93.6          | 57.1   | HDC      |
| <i>Rhinolophus hipposideros</i>    | 41.3          | 73.4          | 56.3   | HDC      |
| <i>Rhinolophus mehelyi</i>         | 50.4          | 103.5         | 47.9   | HDC      |
| <b>Suborder Yangochiroptera</b>    |               |               |        |          |
| Emballonuridae                     |               |               |        |          |
| <i>Diclidurus alba</i>             | 13.8          | 156.4         | 9.6    | LDC      |
| <i>Rhynchonycteris naso</i>        | 5.1           | 49.7          | 10.3   | LDC      |
| Noctilionidae                      |               |               |        |          |
| <i>Noctilio leporinus*</i>         | 13.5          | 108.3         | 12.4   | LDC      |
| Mormoopidae                        |               |               |        |          |
| <i>Mormops blainvilli</i>          | 3.1           | 40.3          | 7.8    | LDC      |
| <i>Pteronotus davyi</i>            | 6.1           | 66.3          | 9.2    | LDC      |
| <i>Pteronotus gymnonotus</i>       | 5.2           | 40.7          | 12.9   | LDC      |
| <i>Pteronotus macleayi</i>         | 4.3           | 54.3          | 8.0    | LDC      |
| <i>Pteronotus parnellii</i>        | 30.9          | 72.9          | 43.3   | HDC      |
| <i>Pteronotus personatus</i>       | 4.9           | 43.3          | 12.4   | LDC      |
| <i>Pteronotus quadricens</i>       | 3.5           | 42.7          | 8.2    | LDC      |
| Phyllostomidae                     |               |               |        |          |
| <i>Monophyllus redmanii</i>        | 1.7           | 33.1          | 5.0    | LDC      |
| Vespertilionidae                   |               |               |        |          |
| <i>Eptesicus furinalis</i>         | 7.4           | 325.0         | 2.3    | LDC      |
| <i>Eptesicus fuscus</i>            | 4.9           | 81.1          | 7.9    | LDC      |
| <i>Kertivoula</i> spp.             | 1.4           | 30.9          | 6.8    | LDC      |
| <i>Lasiurus borealis</i>           | 9.7           | 136.7         | 7.1    | LDC      |
| <i>Lasiurus cinereus</i>           | 11.9          | 246.1         | 4.8    | LDC      |
| <i>Murina leukogaster</i>          | 0.7           | 43.4          | 1.7    | LDC      |
| <i>Myotis evotis</i>               | 4.0           | 107.1         | 3.8    | LDC      |
| <i>Myotis lucifugus</i>            | 5.9           | 96.3          | 6.1    | LDC      |
| <i>Otonycteris hemprichii</i>      | 4.3           | 137.0         | 3.4    | LDC      |
| <i>Perimyotis subflavus</i>        | 10.8          | 135.8         | 8.0    | LDC      |
| <i>Pipistrellus</i> sp.            | 5.2           | 92.2          | 5.8    | LDC      |
| Molossidae                         |               |               |        |          |
| <i>Molossus molossus</i>           | 10.7          | 97.1          | 12.5   | LDC      |
| <i>Molossus rufus</i>              | 13.1          | 176.6         | 7.4    | LDC      |
| <i>Molossus</i> sp.*               | 14.2          | 69.3          | 20.7   | LDC      |
| <i>Tadarida brasiliensis</i>       | 13.4          | 278.1         | 4.8    | LDC      |
| <i>Tadarida teniotis</i>           | 12.2          | 152.5         | 13.1   | LDC      |

DC, duty cycle; *d*, call duration; *T*, period; DC=(*d*/*T*)×100.

Shown are search phase echolocation data for 37 species of bats free flying in the field or calling from a perch. Low duty cycle (LDC) echolocation is defined as DC <25%; high duty cycle (HDC) echolocation is defined as DC ≥25%. Species marked with an asterisk are reported to have variable duty cycle echolocation.

track prey in dense vegetation and thus forage in areas with high background acoustic (echoic) clutter (Bell and Fenton, 1984). HDC bats may also be more readily attracted to fluttering targets than LDC bats (Goldman and Henson, 1977; Lazure and Fenton, 2011). In these respects, HDC echolocators differ from LDC echolocators.

Echoes returning to a flying bat are Doppler shifted because of changes in the relative velocities of the bat and target (Schnitzler, 1968; Schnitzler, 1970; Schnitzler, 1973). The CF component of the echo becomes shifted up (down) in frequency as the distance between the flying bat and insect decreases (increases). Doppler-

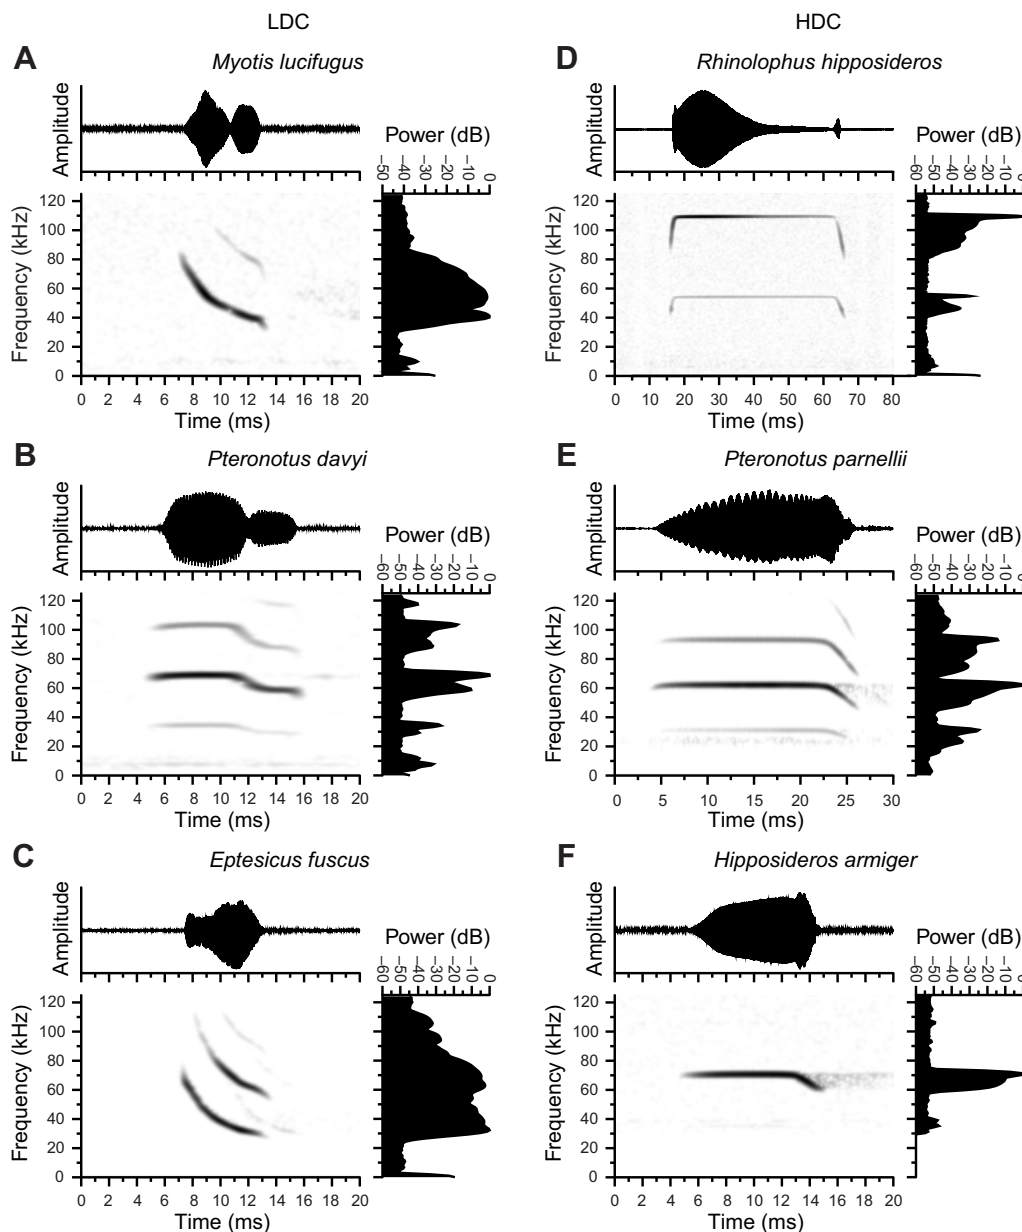

Fig. 2. Echolocation calls of LDC and HDC bats. Comparison of single echolocation calls demonstrates that signal duration, call structure and/or signal bandwidth alone cannot uniquely discriminate LDC from HDC echolocators. (A–C) Single search phase calls from LDC echolocators; (D–F) search phase calls from HDC species. For each call we show an oscillogram (top), a spectrogram (bottom left) and a fast Fourier transform (FFT) power spectrum (bottom right). The calls of *H. armiger* have been high-pass filtered (30 kHz cutoff frequency) to remove background insect noise. Oscillogram signal amplitude is displayed in arbitrary units.

shifted echoes may also contain ‘acoustic glints’ that appear as fluctuations in the amplitude and spectral composition within the CF component. Glints are generated by the rhythmic motion of the insect’s wings relative to the direction of sound propagation from the bat (Schnitzler et al., 1983; Kober and Schnitzler, 1990; Henson et al., 1987). HDC bats do not compensate for Doppler shifts generated by insect wing movements (Trappe and Schnitzler, 1982).

Echoes from the long duration calls of HDC bats may contain multiple amplitude and frequency glints. The time interval between individual glints in the echo corresponds to about the reciprocal of twice the insect’s wingbeat rate (Schnitzler et al., 1983; Koselj et al., 2011). Amplitude glints are produced by changes in the reflective area of the fluttering insect target. Specifically, when the insect’s wings are perpendicular to the direction of sound propagation (typically near the top or bottom of the stroke), this presents a larger reflective surface that can increase echo amplitudes by  $\geq 20$  dB compared with the body of the insect when the wings are horizontal (Henson et al., 1987; Kober et al., 1985).

Frequency glints are Doppler-shifted spectral broadenings in the CF component of the echo resulting from the motion of insect’s wings towards or away from the bat (Schnitzler et al., 1983). Frequency glints appear as a  $\pm 2$  kHz spectral broadening in the CF echo, and the sign of the frequency change (re. the CF component) indicates the direction of wing motion (Schnitzler and Denzinger, 2011). Such brief frequency glints are superimposed on the overall Doppler-shifted CF echo from the insect’s body. *Rhinolophus ferrumequinum* can resolve differences in flutter rate of  $< 10$  Hz for frequencies within its auditory fovea (von der Emde and Menne, 1989).

HDC bats may recognize particular types of insects by wingbeat signatures encoded in the amplitude and frequency glints of returning echoes (Schuller, 1984; Schnitzler, 1987; Kober and Schnitzler, 1990). Wingbeat signatures and other features of prey flight patterns may help determine which items are attacked or ignored by HDC echolocators when a smorgasbord of insects is available (Koselj et al., 2011). Echoes from LDC echolocation calls contain less glint-related information and thus may not provide the



sensory feedback necessary to make precise decisions about prey selection (i.e. to be a 'picky eater'). Echoes from the calls of HDC bats encode the temporal patterning (spacing) of acoustic glints and follow the rhythm of the insect's wingbeat cycle (Schnitzler et al., 1983; Kober and Schnitzler, 1990). Wingbeat rates of flying insects typically range from 10 to 50 Hz ( $T=100-20$  ms), so only some HDC bats with CF durations  $>40$  ms (mainly rhinolophids) will frequently receive single echoes containing multiple acoustic glints over several wingbeat cycles. Hipposiderids and *P. parnellii* presumably obtain this information over several successive echoes. Evidence of foraging selectivity comes from observations of several species of HDC bats that responded to and tracked passing insects, but only attacked some of them [e.g. *Hipposideros commersoni* (Vaughan, 1977), *Rhinolophus rouxi* (Neuweiler et al., 1987), *R. ferrumequinum* and *R. hipposideros* (Jones and Rayner, 1989)]. This in contrast to LDC species, some of which attack inanimate objects in the wild (Acharya and Fenton, 1992; Barclay and Brigham, 1994).

Relative to LDC echolocators, HDC bats dramatically increase call duty cycle during prey capture attempts (Vogler and Neuweiler, 1983; Schnitzler et al., 1985; Jacobs et al., 2008), suggesting the increase in duty cycle indicates that a bat has detected a fluttering target and is locking onto the target and/or confirming its identity. Multiple time- and frequency-smear background clutter echoes may make the amplitude and frequency glints of fluttering insects more conspicuous in a manner analogous to stochastic resonance processing in the auditory system (e.g. Henry, 1999). A comparison of search phase echolocation call sequences emitted by LDC and HDC bats free-flying in the field or calling from a perch (Fig. 1) demonstrates that HDC bats have the potential to acquire more detailed and almost continuous data about fluttering targets compared with LDC bats. Table 1 presents typical call duration, period and duty cycle data for search phase echolocation calls of representative bats.

#### Variable duty cycle echolocation

The distinction between HDC and LDC echolocation is generally consistent (Fig. 1; Table 1), but some foraging molossid (e.g. *Molossus* spp. but typically not *Eumops* spp., *Otomops* spp., *Tadarida* spp.) emit calls with duty cycles between 15% and 30%. As yet, there is no evidence that *Molossus* spp. perform Doppler shift compensation or that they are attracted to fluttering targets. The basilar membrane of *Tadarida brasiliensis* shows a slight expansion (6 mm per octave) in the frequency range used for echolocation, but nothing approaching the overrepresentation specialization of the sensory epithelium associated with the acoustic fovea in HDC bats [40 mm per octave (Vater and Siefert, 1995)]. Furthermore, when flying in the lab, many LDC bats emit calls with a shorter duration and period and an increased duty cycle relative to when they are calling in the field [e.g. *Eptesicus fuscus* (Surlykke and Moss, 2000)]. Hence, most if not all bats increase duty cycle when trying to collect more information about situations in which they are operating, just not to the extent of HDC echolocators (Simmons et al., 1979).

Data from a small molossid (*Molossops temminckii*) recorded in the field reveal duty cycles from ~6% to ~18% (Guillén-Servent and Ibáñez, 2007). The echolocation behaviour of *Noctilio* species (*N. albiventris*, *N. leporinus*; Noctilionidae) demonstrates flexibility in duty cycle among bats previously considered to be LDC echolocators. When foraging, *Noctilio* spp. emit a mixture of calls with just CF, just FM or a combination of CF-FM components and regularly alternate duty cycle between 10% and 40%

(Schnitzler et al., 1994; Kalko et al., 1998). Both *Noctilio* spp. partially compensate for flight-induced (but not target-induced) Doppler shifts in echoes by lowering the CF components of their emitted signals (Wenstrup and Suthers, 1984; Roverud and Grinnell, 1985). Auditory brainstem responses in *N. leporinus* reveal moderately sharp neural tuning near the CF component of its narrowband echolocation calls (Wenstrup, 1984); however, peripheral and central specializations of its auditory system are not known to provide an auditory fovea.

None of the bats categorized as LDC in Table 1 shows the unique combination of the four features we identify as being characteristic of HDC echolocators. The presence of individual features such as narrowband calls, increases in duty cycle during prey capture, narrowly tuned neurons or Doppler shift compensation do not alone represent HDC echolocation as we have identified it. Doppler shift compensation is mainly restricted to HDC echolocators, although among mormoopids both *P. parnellii* (an HDC echolocator) and *Pteronotus personatus* (an LDC echolocator) perform Doppler shift compensation, whereas other LDC mormoopids (e.g. *Mormoops megalophyllus* and *Pteronotus davyi*) do not (Smotherman and Guillén-Servent, 2008). Arguably the situation in molossids, noctilionids and mormoopids other than *P. parnellii* demonstrates that LDC echolocators have tremendous potential to modify patterns of call production and information processing.

#### Evolution of HDC echolocation

Current morphological and molecular evidence suggests that the monophyletic order Chiroptera is composed of two suborders (Teeling, 2009), each including HDC laryngeal echolocators – the Yinpterochiroptera (Rhinolophidae and Hipposideridae) and Yangochiroptera (Mormoopidae – *P. parnellii*; 1 species). If LDC laryngeal echolocation was the ancestral condition in echolocating bats, then it could have evolved once and persisted in all Yangochiroptera and most Yinpterochiroptera (Fig. 3). In this scenario, laryngeal echolocation was lost within one group (Pteropodidae) of Yinpterochiroptera. In some pteropodid species from the genus *Rousettus* tongue-click echolocation subsequently evolved. This hypothesis is supported by two observations. First, the echolocation signals of all bats except *Rousettus* spp. are tonal and produced in the larynx. Second, in laryngeally echolocating bats the stylohyal bone (part of the mammalian hyoid apparatus) contacts, and sometimes is fused with, the tympanic bone, which surrounds and supports the tympanic membrane. Neither condition – echolocation calls with time-frequency structure or stylohyal-tympanic bone contact – occurs in pteropodid bats, including those that echolocate with tongue clicks (Veselka et al., 2010a).

Alternatively, LDC echolocation could have evolved independently in Yinpterochiroptera and Yangochiroptera. If LDC echolocation was the ancestral condition in bats, then either scenario necessitates the independent evolution of HDC echolocation at least once in both suborders. At present it is not possible to resolve which scenario is correct.

Simmons (Simmons, 1980) suggested that a short duration CF call with multiple harmonics was the ancestral condition in laryngeally echolocating bats, and that the principal trend in the evolution of echolocation was a broadening of signal bandwidth by the introduction of FM components. In this scenario, long duration CF-FM echolocation calls, an auditory fovea with specializations for glint/flutter detection and Doppler shift compensation would be more specialized (derived) conditions that evolved independently

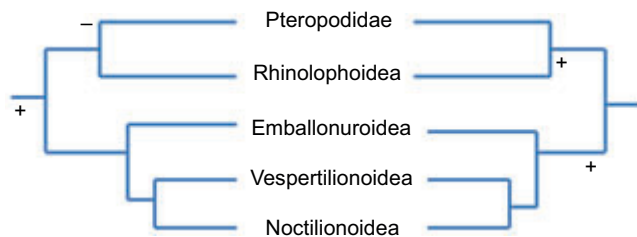

Fig. 3. Evolution of LDC and HDC echolocation in bats. Two equally parsimonious scenarios for the evolution of echolocation in the two currently recognized suborders of bats, the Yinpterochiroptera and the Yangochiroptera. Left, laryngeal echolocation is presumed to be ancestral and has evolved once (+) but was lost (-) in the family Pteropodidae. Right, laryngeal echolocation is presumed to have evolved twice, once in the lineage leading to the Yangochiroptera (+) and again in the lineage leading to the Rhinolophoidea (+). After Fenton and Ratcliffe (Fenton and Ratcliffe, 2010). The superfamily Rhinolophoidea includes the families Rhinolophidae, Hipposideridae, Rhinopomatidae, Craseonycteridae and Megadermatidae. The superfamily Emballonuroidea includes the families Emballonuridae and Nycteridae. The superfamily Vespertilionoidea includes the families Vespertilionidae, Thyropteridae, Natalidae, Furiferidae, Molossididae, Myzopodidae and Miniopteridae. The superfamily Noctilionoidea includes Noctilionidae, Mormoopidae and Phyllostomidae.

in the Rhinolophidae and Hipposideridae (Yinpterochiroptera) and in the mormoopoid *P. parnellii* (Yangochiroptera).

Increasing the strength of the outgoing vocalization from the larynx was an essential adaptation in the evolution of echolocation to track flying insects (Fenton et al., 1995). Echolocation in air is a relatively short-range operation because of the physics of sound propagation through the atmosphere. Two factors are involved. First, geometric spreading (i.e. the inverse square law) reduces energy in both outgoing sounds and returning echoes equally across all frequencies. Second, the absorption of sound energy by water molecules in the atmosphere increases dramatically at frequencies above 30 kHz (Lawrence and Simmons, 1982), compounding attenuation by geometric spreading. Many echolocating bats emit signals with amplitudes in excess of 130 dB SPL (re. 20  $\mu$ Pa) at 10 cm in front of the bat's mouth (Holderied et al., 2005; Surlykke and Kalko, 2008). Such high SPLs allow bats to detect insect targets at 20–30 m (Surlykke and Kalko, 2008), much greater detection distances than previously reported [ca. 3–5 m (Kick, 1982)]. Together, detection distance and flight speed have an important impact on foraging by aerial-hawking bats. A bat flying at 5 m s<sup>-1</sup> that detects a moth at 30 m has 6 s to react, while one flying at 10 m s<sup>-1</sup> has only 3 s to react. Thus, reducing outgoing call strength results in a shorter effective operating range, giving bats less time to detect, track and intercept airborne targets.

The echolocation calls of laryngeally echolocating bats show structured changes in frequency over time. Call frequencies range from ~8 to >200 kHz, and most species emit calls with peak energy between 20 and 60 kHz (Jacobs et al., 2008). Sounds of higher frequency have shorter wavelengths and reflect more efficiently from small targets such as fluttering insects. Bats that emit echolocation calls with a large signal bandwidth have more listening frequencies available to extract details from echoes about the size, shape, velocity and distance to a target (Simmons and Stein, 1980). Conversely, sounds of lower frequencies have longer wavelengths, are less subject to excess attenuation, and provide a greater operating range of echolocation.

Long duration, narrowband calls (Figs 1, 2) are not unique to HDC echolocators as many bats emit long narrowband search phase signals in open habitats (e.g. *E. fuscus*, *Lasiurus cinereus*, *T. brasiliensis*, *Tadarida midas*, *Tadarida teniotis*, *Otomops martiensseni*, *N. leporinus*, *N. albiventris*). The use of long duration narrowband calls is adaptive in these situations because it focuses spectral energy and provides for a larger operating range (Simmons and Stein, 1980). According to Parseval's theorem, power spectral density level increases by 10 dB for every decade reduction in signal bandwidth with no additional costs of call emission (Oppenheim et al., 1999). Flutter detection is not limited to bats using HDC echolocation as some vespertilionids [*Pipistrellus stenopterus* (Sum and Menne, 1988); *Murina* spp. and *Kerivoula* spp. (Lazure and Fenton, 2011)] and both *Noctilio* spp. also have this ability. Both HDC and LDC bats may use passive hearing to detect the fluttering and/or walking sounds of insects on surfaces (e.g. Bell, 1982; Link et al., 1986; Faure and Barclay, 1992).

Bats that employ LDC echolocation are unlikely to receive echoes with multiple acoustic glints (Schnitzler and Denzinger, 2011). Indeed, the echolocation calls of *Kerivoula* spp. and *Murina* spp. are the antithesis of those used by HDC echolocators because they are extremely short (~1 ms), broadband (~100 kHz) FM sweeps (Schmieder et al., 2010). Some *Kerivoula* and *Murina* spp. detect flutter, but the cues they use remain unknown (Lazure and Fenton, 2011).

Temporal overlap between outgoing sounds and returning echoes is an important feature of HDC echolocation. In *P. parnellii*, the beginning of the approach phase is signalled by an increase in pulse duration resulting in prominent pulse–echo overlap (Novick and Vaisnys, 1964). Pulse–echo overlap is well known for the echolocation calls of HDC bats and is essential for proper Doppler shift compensation in *R. ferrumequinum* (Griffin, 1962; Schuller, 1974), whereas the FM component in the CF–FM calls of *R. ferrumequinum* is not necessary for Doppler shift compensation (Schuller, 1977). In theory, a bat could use pulse–echo overlap to detect the presence of and distance to objects (Novick, 1971). Biosonar pulses overlapping with echoes from an insect's body or from stationary targets in the background will generate interference patterns that differ from the acoustical glints generated by fluttering prey. The interference patterns generate amplitude modulations in the echoes corresponding to the frequency difference between overlapping sounds (i.e. pulse and echo, echo and echo), and such signals have an additional cue that may play a role in object detection by HDC bats (Pye, 1960; Pye, 1961; Kay, 1961; Novick and Vaisnys, 1964; Novick, 1971; Henson et al., 1987).

Detailed studies on the neural basis of hearing and HDC echolocation have been performed on two species: the Old World greater horseshoe bat (*R. ferrumequinum*) and the New World moustached bat (*P. parnellii*). Both possess an auditory fovea with mechanical and physiological specializations of the cochlea and extremely sharply tuned neurons in the peripheral and central auditory systems (Bruns, 1976a; Bruns, 1976b; Suga and Jen, 1976; Suga and Jen, 1977; Pollak et al., 1979; Vater, 1982; Henson et al., 1985; Kössl and Vater, 1985). Neurons in the inferior colliculus of *R. ferrumequinum* and *P. parnellii* have specialized response properties that encode signal parameters such as fundamental wingbeat frequency and amplitude and frequency glints present in echoes from fluttering insects (Vater, 1981; Bodenhamer and Pollak, 1983; Schuller, 1984; O'Neill, 1985).

Two populations of cells with specialized response properties may further facilitate combinatorial processing of loud outgoing vocalizations with information contained in later returning weaker

echoes. These are delay-tuned and duration-tuned neurons. Delay-tuned neurons are found in the inferior colliculus and cortex of both LDC and HDC bats, and are thought to be important for extracting information about target range/distance (O'Neill and Suga, 1979; Sullivan, 1982; Schuller et al., 1991; Casseday et al., 1994; Yan and Suga, 1996; Galazyuk and Feng, 1997; Portfors and Wenstrup, 1999). Delay-tuned neurons show a facilitated response and fire maximally when the timing (delay) between two sounds – the outgoing pulse and returning echo – corresponds to the cell's best delay. Duration-tuned neurons are temporally selective cells that respond only when signals of the correct frequency are presented at a specific duration (Faure et al., 2003). Duration-tuned neurons are also tuned in frequency and some are tuned to stimulus amplitude (Fremouw et al., 2005). Because duration-tuned neurons are found in both echolocating and non-echolocating vertebrates, the ability to echolocate cannot be a prerequisite for the evolution of duration selectivity in bats. Nevertheless, this does not preclude a functional role for duration tuning in the neural basis of echolocation (Sayegh et al., 2011; Aubie et al., 2012). Duration-tuned neurons have also been reported from the inferior colliculus of LDC and HDC bats, and in both New World and Old World species (e.g. Casseday et al., 1994; Fuzessery and Hall, 1999; Mora and Kössl, 2004; Luo et al., 2008; Macías et al., 2011).

In short, the brains of echolocating bats have populations of neurons that fire action potentials only in response to stimuli that possess a specific combination of signal duration, frequency, amplitude and/or delay. We hypothesize that this type of temporal-spectral-amplitude response selectivity may be crucial for locking on and tracking flying targets using echolocation.

#### Advantages of HDC echolocation

The preceding background demonstrates that, compared with LDC bats, the unique combination of features associated with HDC echolocation – long duration calls dominated by a CF component, an acoustic fovea and Doppler shift compensation – allowed bats to detect, lock onto and track fluttering insects. Therefore, we propose that HDC echolocation originated because it allowed hunting bats better access to nocturnal prey, especially in cluttered habitats. The difference in foraging effectiveness reflects the reality that HDC bats may acquire a stream of roughly 2–4 times as much information with the same number of call emissions as LDC bats (Fig. 1; Table 1). The longer duration calls of HDC bats also offer the potential for detecting multiple amplitude and frequency glints generated by fluttering insects. This hypothesis generates four specific and testable predictions.

First, compared with LDC bats, HDC echolocators should respond more often to presentations of fluttering insect targets, especially in areas with increased background clutter. By presenting artificial fluttering targets to foraging bats it is possible to assess the willingness of bats to investigate and attack such targets. By monitoring echolocation calls at the same time, researchers can compare the responses of HDC and LDC echolocators, and identify other strategies that bats may use to detect fluttering targets [e.g. LDC bats in the genera *Murina* and *Kerivoula* (Lazure and Fenton, 2011)].

Second, compared with LDC bats, HDC bats should be better able to exploit wingbeat signatures of fluttering insects and be more likely to show selective foraging. This prediction can be tested by identifying and comparing the diversity of insect prey in the diets of sympatric HDC and LDC bats. Specifically, this can be done using DNA barcodes obtained from insect fragments in faeces in areas where HDC and LDC bats forage sympatrically (Clare et al.,

2009; Clare et al., 2011; Goertlitz et al., 2010). HDC bats are expected to take fewer prey species and show more consistent patterns of prey selection. Hipposiderids appear to feed heavily on moths (Haberseizer et al., 1984; Link et al., 1986). Moths should be preferred prey because many are soft-bodied, medium- to large-sized insects and relatively slow flyers. Fluttering insects that have auditory deficits or that lack bat-detecting ears may be particularly easy targets for 'lock and track' echolocators (Faure and Hoy, 2000).

Third, if delay-tuned and duration-tuned neurons allow HDC bats to better lock onto and track fluttering insects, then the response physiology of these cells should differ between HDC and LDC echolocators. Delay-tuned and duration-tuned neurons occur in both HDC and LDC bats, suggesting a more general role in hearing and echolocation. We speculate that HDC bats should have delay-tuned and duration-tuned neurons tuned to longer pulse intervals and signal durations than LDC bats (e.g. Schuller et al., 1991; Mora and Kössl, 2004; Luo et al., 2008). Moreover, the bandwidth of the frequency tuning curves of duration-tuned and delay-tuned neurons should be narrower in HDC bats, with a high proportion of neurons tuned at or just above the CF resting frequency.

Fourth, HDC bats should spend proportionally more time foraging for insects in cluttered habitats than LDC bats of comparable body size, wing morphology and flight characteristics. In acoustically cluttered habitats, we expect HDC echolocators to have an advantage over most LDC echolocators in detecting, tracking and identifying fluttering insect prey, but this prediction applies only to bats using echolocation to detect prey in cluttered habitats.

There are many records of bats attacking airborne, insect-sized targets, from small pebbles to dry flies used in fishing (Acharya and Fenton, 1992; Barclay and Brigham, 1994). This raises the question: do HDC echolocators sometimes behave as if they were LDC echolocators? If so, like many LDC echolocators, they should sometimes detect, track and attack airborne, non-fluttering insect-sized prey. However, if HDC echolocators are primed to respond to fluttering targets, then we predict that they will not attempt to attack airborne but non-fluttering targets. Field and flight room observations suggest the latter may be the case (Bell and Fenton, 1984; Jacobs et al., 2008), as some HDC bats did not track aerial insect-sized targets whose wings were not moving (Goldman and Henson, 1977; Link et al., 1986).

#### Disadvantages of HDC echolocation

One obvious disadvantage of using HDC echolocation arises because this strategy involves broadcasting calls over a longer period of time, an important feature for glint detection. Longer duration calls contain more energy, which can increase information leakage and make HDC echolocation signals more conspicuous to conspecifics, predators and prey (Faure et al., 1990; Jacobs et al., 2008). Longer duration calls are presumably more expensive to produce than shorter duration calls of the same frequency. Kingston and Rossiter recognized the potential impact on communication of the echolocation calls used by HDC bats (Kingston and Rossiter, 2004). Focusing signal energy into a narrower bandwidth can also make HDC calls more conspicuous to insects with hearing-based defences (Jacobs et al., 2008). Because the peak spectral frequencies of bats using HDC echolocation are often higher than those using LDC echolocation, the costs of emitting longer duration signals may be offset by the benefits of shifting peak energy to higher frequencies. The ears of bat-detecting insects are typically



most sensitive to sound frequencies ranging from 20 to 60 kHz, which may explain the prevalence of higher frequency sounds in the echolocation calls of HDC bats (Jones, 1999) and supports Fullard's (Fullard, 1987) allotonic frequency hypothesis (e.g. Pavey and Burwell, 1998; Jacobs, 2000). Once an HDC bat has locked onto a flying target, it may be less vulnerable to evasive manoeuvres of prey compared with an LDC bat, in part because of the absence of long intervals between successive target echoes.

The specialization of the thoracic skeleton in some species of HDC echolocators suggests that a high duty cycle approach requires a different pattern and rhythm of respiration than LDC echolocation. It remains to be determined whether the broad flat ribs characteristic of rhinolophids and hipposiderids are morphological specializations associated with HDC echolocation (Desroche et al., 2007). Data on the cost of echolocation call production are all from LDC species (Speakman and Racey, 1991).

The prevalence of LDC echolocation among insectivorous bats demonstrates that this approach to detecting and tracking prey is successful and works well in most situations. There is no evidence of an HDC species adopting an LDC echolocation strategy, although some bats (e.g. *Molossus* spp., *M. temminckii*, *Noctilio* spp.) may alternate between an LDC- and HDC-like signalling strategy (Table 1). The fundamental dichotomy between the strategies may come down to more time-focused (HDC) versus frequency-focused (LDC) analyses by the brains of echolocators. More specific details about patterns of habitat use are required to demonstrate any foraging advantage accruing to HDC bats, especially in cluttered environments.

#### Evolution of bats

The origin and evolution of flight and echolocation in bats remains a topic of debate (e.g. Fenton et al., 1995; Simmons and Geisler, 1998; Speakman, 2001; Schnitzler et al., 2004). Powered flight is a diagnostic feature that sets bats apart from all other mammals. The evolution of echolocation has profoundly influenced the diversification of Chiroptera, but the ability to echolocate is neither diagnostic of nor unique to bats. Post-cranial anatomy of the earliest known fossil bat, *Onychonycteris finneyi*, reveals that this Eocene species could fly, but whether it could echolocate is unclear (Simmons et al., 2008; Veselka et al., 2010a; Veselka et al., 2010b). There are three points of view about the origin of flight and echolocation in bats: (1) that flight evolved first, giving the ancestors of bats increased mobility in forested/cluttered habitats (Simmons and Geisler, 1998); (2) that echolocation evolved first, giving the gliding ancestors of bats access to a previously under-exploited food source (nocturnal flying insects) in forested/cluttered habitats (Fenton et al., 1995); and (3) that echolocation and flight co-evolved because coordinating the production of repetitive, high amplitude vocalizations with the downstroke of flight reduced the overall costs of sound production (Speakman and Racey, 1991). The possible origins of echolocation in bats has been the topic of some discussion and has repercussions for interpreting chiropteran phylogeny and evolutionary divergence (Teeling, 2009; Simmons et al., 2010; Veselka et al., 2010b).

We agree with the view that the ancestors of bats hunted from perches and glided in pursuit of flying insects that were detected and tracked using LDC laryngeal echolocation. HDC echolocation calls developed as a specialized extension of using long, narrowband echolocation calls that improved the ability of bats with powered flight to detect, lock onto and track flying prey, probably in areas of high clutter. The evolution of HDC echolocation involves considerable anatomical and physiological

specialization over and above LDC echolocation, and this may account for its relative scarcity among insectivorous bats (~160 HDC versus ~900 LDC species). Additional phylogenetic reconstructions and comparative studies are needed to better understand and estimate the pattern of adaptations favouring the evolution of HDC echolocation in bats.

#### ACKNOWLEDGEMENTS

We dedicate this paper to the memories of Eli (E. K. V.) Kalko and Björn (B. M.) Siemers who left the world of bat research far too soon. We thank Louis Lazure, Liam McGuire and Mark Skowronski for discussions about this hypothesis without implying that they agree with it. We are grateful to Signe Brinkløv, Kayleigh Fawcett, Ying-Yi Ho, Elisabeth Kalko, Winston Lancaster, Björn Siemers, Michael Smotherman and Kirstin Übernickel for providing recordings of additional tropical and European species. We thank Natalie Cheng for help with sound analyses, and Amanda Adams, Beth Clare, Matthew Emrich, Erin Fraser, Rachel Hamilton, Colin Hayward, Meredith Jantzen and two anonymous reviewers for commenting on earlier drafts of the manuscript.

#### FUNDING

Our research on bats is supported by Discovery and Research Tools and Instrumentation Grants from the Natural Sciences and Engineering Research Council of Canada (M.B.F., P.A.F.), the Canada Foundation for Innovation and Ontario Innovation Trust (P.A.F.), and the Danish Natural Sciences Research Council (J.M.R.).

#### REFERENCES

- Acharya, L. and Fenton, M. B. (1992). Echolocation behaviour of vespertilionid bats (*Lasiurus cinereus* and *Lasiurus borealis*) attacking airborne targets including arctiid moths. *Can. J. Zool.* **70**, 1292-1298.
- Aubie, B., Sayegh, R. and Faure, P. A. (2012). Duration tuning across vertebrates. *J. Neurosci.* **32**, 6373-6390.
- Barclay, R. M. R. and Brigham, R. M. (1994). Constraints on optimal foraging: a field test of prey discrimination by echolocating insectivorous bats. *Anim. Behav.* **48**, 1013-1021.
- Bell, G. P. (1982). Behavioral and ecological aspects of gleaning by a desert insectivorous bat, *Antrozous pallidus* (Chiroptera: Vespertilionidae). *Behav. Ecol. Sociobiol.* **10**, 217-223.
- Bell, G. P. and Fenton, M. B. (1984). The use of Doppler-shifted echoes as a flutter detection and clutter rejection system: the echolocation and feeding behavior of *Hipposideros ruber* (Chiroptera: Hipposideridae). *Behav. Ecol. Sociobiol.* **15**, 109-114.
- Bodenhamer, R. D. and Pollak, G. D. (1983). Response characteristics of single units in the inferior colliculus of mustache bats to sinusoidal frequency modulated signals. *J. Comp. Physiol. A* **153**, 67-79.
- Bruns, V. (1976a). Peripheral auditory tuning for fine frequency analysis by the CF-FM bat, *Rhinolophus ferrumequinum*. I. Mechanical specializations of the cochlea. *J. Comp. Physiol. A* **106**, 77-86.
- Bruns, V. (1976b). Peripheral auditory tuning for fine frequency analysis by the CF-FM bat, *Rhinolophus ferrumequinum*. II. Frequency mapping in the cochlea. *J. Comp. Physiol. A* **106**, 87-97.
- Buchler, E. R. (1976). The use of echolocation by the wandering shrew, *Sorex vagrans*. *Anim. Behav.* **24**, 858-873.
- Casseday, J. H., Ehrlich, D. and Covey, E. (1994). Neural tuning for sound duration: role of inhibitory mechanisms in the inferior colliculus. *Science* **264**, 847-850.
- Clare, E., Fraser, E., Braid, H., Fenton, M. B. and Hebert, P. (2009). Unravelling complex food webs with simple molecules: a generalist predator the eastern red bat (*Lasiurus borealis*) and its arthropod prey. *Mol. Ecol.* **18**, 2532-2542.
- Clare, E. L., Barber, B. R., Sweeney, B. W., Hebert, P. D. N. and Fenton, M. B. (2011). Eating local: influences of habitat on the diet of little brown bats (*Myotis lucifugus*). *Mol. Ecol.* **20**, 1772-1780.
- Desroche, K., Fenton, M. B. and Lancaster, W. C. (2007). Echolocation and the thoracic skeletons of bats: a comparative morphological study. *Acta Chiropt.* **9**, 483-494.
- Elemans, C. P. H., Mead, A. F., Jakobsen, L. and Ratcliffe, J. M. (2011). Superfast muscles set maximum call rate in echolocating bats. *Science* **333**, 1885-1888.
- Faure, P. A. and Barclay, R. M. R. (1992). The sensory basis of prey detection by the long-eared bat, *Myotis evotis*, and the consequences for prey selection. *Anim. Behav.* **44**, 31-39.
- Faure, P. A. and Hoy, R. R. (2000). Auditory symmetry analysis. *J. Exp. Biol.* **203**, 3209-3223.
- Faure, P. A., Fullard, J. H. and Barclay, R. M. R. (1990). The response of tympanate moths to the echolocation calls of a substrate gleaning bat, *Myotis evotis*. *J. Comp. Physiol. A* **166**, 843-849.
- Faure, P. A., Fremouw, T., Casseday, J. H. and Covey, E. (2003). Temporal masking reveal properties of sound-evoked inhibition in duration-tuned neurons of the inferior colliculus. *J. Neurosci.* **23**, 3052-3065.
- Fenton, M. B. and Ratcliffe, J. M. (2010). Bats. *Curr. Biol.* **20**, R1060-R1062.
- Fenton, M. B., Audet, D., Obrist, M. K. and Rydell, J. (1995). Signal strength, timing and self-deafening: the evolution of echolocation in bats. *Paleobiology* **21**, 229-242.



- Fremouw, T., Faure, P. A., Casseday, J. H. and Covey, E. (2005). Duration selectivity of neurons in the inferior colliculus of the big brown bat: tolerance to changes in sound level. *J. Neurophysiol.* **94**, 1869-1878.
- Fullard, J. H. (1987). Sensory ecology and neuroethology of moths and bats: interactions in a global perspective. In *Recent Advances in the Study of Bats* (ed. M. B. Fenton, P. A. Racey and J. M. V. Rayner), pp. 244-273. Cambridge, UK: Cambridge University Press.
- Fuzessery, Z. M. and Hall, J. C. (1999). Sound duration selectivity in the pallid bat inferior colliculus. *Hear. Res.* **137**, 137-154.
- Gaioni, S. J., Riquimaroux, H. and Suga, N. (1990). Biosonar behavior of mustached bats swung on a pendulum prior to cortical ablation. *J. Neurophysiol.* **64**, 1801-1817.
- Galazyuk, A. V. and Feng, A. S. (1997). Encoding of sound duration by neurons in the auditory cortex of the little brown bat, *Myotis lucifugus*. *J. Comp. Physiol. A* **180**, 301-311.
- Goertlitz, H. R., ter Hofstede, H. M., Zeale, M. R. K., Jones, G. and Holderied, M. W. (2010). An aerial hawking bat uses stealth echolocation to counter moth hearing. *Curr. Biol.* **20**, 1568-1572.
- Goldman, L. J. and Henson, O. W., Jr (1977). Prey recognition and selection by the constant frequency bat, *Pteronotus p. parnellii*. *Behav. Ecol. Sociobiol.* **2**, 411-419.
- Gould, E. (1965). Evidence for echolocation in the Tenrecidae of Madagascar. *Proc. Am. Philos. Soc.* **109**, 352-360.
- Griffin, D. R. (1944). Echolocation by blind men and radar. *Science* **100**, 589-590.
- Griffin, D. R. (1958). *Listening in the Dark*. New Haven, CT: Yale University Press.
- Griffin, D. R. (1962). Comparative studies of the orientation sounds of bats. *Symp. Zool. Soc. London*, **7**, 61-72.
- Griffin, D. R., Novick, A. and Kornfield, M. (1958). The sensitivity of echolocation in the fruit bat, *Rousettus*. *Biol. Bull.* **115**, 107-113.
- Griffin, D. R., Webster, F. A. and Michael, C. R. (1960). The echolocation of flying insects by bats. *Anim. Behav.* **8**, 141-154.
- Guillén-Servent, A. and Ibáñez, C. (2007). Unusual echolocation behaviour in a small molossid bat, *Molossops temminckii*, that forages near background clutter. *Behav. Ecol. Sociobiol.* **61**, 1599-1613.
- Habersetzer, J., Schuller, G. and Neuweiler, G. (1984). Foraging behavior and Doppler shift compensation in echolocating hipposiderid bats, *Hipposideros bicolor* and *Hipposideros speoris*. *J. Comp. Physiol. A* **155**, 559-567.
- Henry, K. R. (1999). Noise improves transfer of near-threshold, phase-locked activity of the cochlear nerve: evidence for stochastic resonance? *J. Comp. Physiol. A* **184**, 577-584.
- Henson, O. W., Jr, Schuller, G. and Vater, M. (1985). A comparative study of the physiological properties of the inner ear in Doppler shift compensating bats (*Rhinolophus rouxi* and *Pteronotus parnellii*). *J. Comp. Physiol. A* **157**, 587-597.
- Henson, O. W., Jr, Bishop, A., Keating, A., Kobler, J., Henson, M., Wilson, B. and Hansen, R. (1987). Biosonar imaging of insects by *Pteronotus p. parnellii*, the mustached bat. *Natl. Geogr. Res.* **3**, 82-101.
- Hiryu, S., Katsura, K., Lin, L.-K., Riquimaroux, H. and Watanabe, Y. (2005). Doppler-shift compensation in the Taiwanese leaf-nosed bat (*Hipposideros terasensis*) recorded with a telemetry microphone system during flight. *J. Acoust. Soc. Am.* **118**, 3927-3933.
- Hiryu, S., Shiori, Y., Hosokawa, T., Riquimaroux, H. and Wantabe, Y. (2008). On-board telemetry of emitted sounds from free-flying bats: compensation for velocity and distance stabilizes echo frequency and amplitude. *J. Comp. Physiol. A* **194**, 841-851.
- Holderied, M. W. and von Helversen, O. (2003). Echolocation range and wingbeat period match in aerial-hawking bats. *Proc. Biol. Sci.* **270**, 2293-2299.
- Holderied, M. W., Korine, C., Fenton, M. B., Parsons, S., Robinson, S. and Jones, G. (2005). Echolocation call intensity in the aerial hawking bat *Eptesicus bottae* (Vespertilionidae) studied using stereo videogrammetry. *J. Exp. Biol.* **208**, 1321-1327.
- Jacobs, D. S. (2000). Community level support for the allotonic frequency hypothesis. *Acta Chiropt.* **2**, 197-204.
- Jacobs, D. S., Ratcliffe, J. M. and Fullard, J. H. (2008). Beware of bats, beware of birds: the auditory responses of eared moths to bat and bird predation. *Behav. Ecol.* **19**, 1333-1342.
- Jakobsen, L. and Surlykke, A. (2010). Vespertilionid bats control the width of their biosonar sound beam dynamically during prey pursuit. *Proc. Natl. Acad. Sci. USA* **107**, 13930-13935.
- Jen, P. H.-S. and Kamada, T. (1982). Analysis of orientation signals emitted by the CF-FM bat, *Pteronotus p. parnellii* and the FM bat, *Eptesicus fuscus* during avoidance of moving and stationary obstacles. *J. Comp. Physiol. A* **148**, 389-398.
- Jen, P. H.-S. and Suga, N. (1976). Coordinated activities of middle-ear and laryngeal muscles in echolocating bats. *Science* **191**, 950-952.
- Jones, G. (1999). Scaling of echolocation calls parameters in bats. *J. Exp. Biol.* **202**, 3359-3367.
- Jones, G. and Rayner, J. M. V. (1989). Foraging behaviour and echolocation of wild horseshoe bats *Rhinolophus ferrumequinum* and *R. hipposideros* (Chiroptera: Rhinolophidae). *Behav. Ecol. Sociobiol.* **25**, 183-191.
- Kalko, E. K. V. and Schnitzler, H.-U. (1989). The echolocation and hunting behavior of Daubenton's bat, *Myotis daubentoni*. *Behav. Ecol. Sociobiol.* **24**, 225-238.
- Kalko, E. K. V., Schnitzler, H.-U., Kaipf, I. and Grinnell, A. D. (1998). Echolocation and foraging behavior of the lesser bulldog bat, *Noctilio albigentris*: preadaptations for piscivory? *Behav. Ecol. Sociobiol.* **42**, 305-319.
- Kay, L. (1961). Perception of distance in animal echolocation. *Nature* **190**, 361-362.
- Kick, S. A. (1982). Target-detection by the echolocating bat, *Eptesicus fuscus*. *J. Comp. Physiol. A* **145**, 431-435.
- Kick, S. A. and Simmons, J. A. (1984). Automatic gain control in the bat's sonar receiver and the neuroethology of echolocation. *J. Neurosci.* **4**, 2725-2737.
- Kingston, T. and Rossiter, S. J. (2004). Harmonic-hopping in Wallacea's bats. *Nature* **429**, 654-657.
- Kober, R. and Schnitzler, H.-U. (1990). Information in sonar echoes of fluttering insects available for echolocating bats. *J. Acoust. Soc. Am.* **87**, 882-896.
- Kobler, J. B., Wilson, B. S., Henson, O. W., Jr and Bishop, A. L. (1985). Echo intensity compensation by echolocating bats. *Hear. Res.* **20**, 99-108.
- Koselj, K., Schnitzler, H.-U. and Siemers, B. M. (2011). Horseshoe bats make adaptive prey selection decisions informed by echo cues. *Proc. Biol. Sci.* **278**, 3034-3041.
- Kössl, M. and Vater, M. (1985). The cochlear frequency map of the mustache bat, *Pteronotus parnellii*. *J. Comp. Physiol. A* **157**, 687-697.
- Lawrence, B. D. and Simmons, J. A. (1982). Measurements of atmospheric attenuation at ultrasonic frequencies and the significance for echolocation by bats. *J. Acoust. Soc. Am.* **71**, 585-590.
- Lazure, L. and Fenton, M. B. (2011). High duty cycle echolocation and prey detection by bats. *J. Exp. Biol.* **214**, 1131-1137.
- Link, A., Marimuthu, G. and Neuweiler, G. (1986). Movement as a specific stimulus for prey catching behaviour in rhinolophid and hipposiderid bats. *J. Comp. Physiol. A* **159**, 403-413.
- Luo, F., Metzner, W., Wu, F. J., Zhang, S. Y. and Chen, Q. C. (2008). Duration-sensitive neurons in the inferior colliculus of horseshoe bats: adaptations for using CF-FM echolocation pulses. *J. Neurophysiol.* **99**, 284-296.
- Macías, S., Mora, E. C., Hechavarría, J. C. and Kössl, M. (2011). Duration tuning in the inferior colliculus of the mustached bat. *J. Neurophysiol.* **106**, 3119-3128.
- Mora, E. and Kössl, M. (2004). Ambiguities in sound-duration selectivity by neurons in the inferior colliculus of the bat *Molossus molossus* from Cuba. *J. Neurophysiol.* **91**, 2215-2226.
- Moss, C. F. and Schnitzler, H.-U. (1995). Behavioral studies of auditory information processing. In *Hearing by Bats* (ed. A. N. Popper and R. R. Fay), pp. 87-145. New York, NY: Springer-Verlag.
- Neuweiler, G. (1990). Auditory adaptations for prey capture in echolocating bats. *Physiol. Rev.* **70**, 615-641.
- Neuweiler, G., Metzner, W., Heilmann U., Rübtsamen, R., Eckrich, M. and Costa, H. H. (1987). Foraging behaviour and echolocation in the rufous horseshoe bat (*Rhinolophus rouxi*) of Sri Lanka. *Behav. Ecol. Sociobiol.* **20**, 53-67.
- Novick, A. (1971). Echolocation in bats: some aspects of pulse design. *Am. Sci.* **59**, 198-209.
- Novick, A. and Vainys, J. R. (1964). Echolocation of flying insects by the bat, *Chilonycteris parnellii*. *Biol. Bull.* **127**, 478-488.
- O'Neill, W. E. (1985). Responses to pure tones and linear FM components of the CF-FM biosonar signal by single units in the inferior colliculus of the mustache bat. *J. Comp. Physiol. A* **157**, 797-815.
- O'Neill, W. E. and Suga, N. (1979). Target range-sensitive neurons in the auditory cortex of the mustache bat. *Science* **203**, 69-73.
- Oppenheim, A. V., Schaffer, R. W. and Buck, J. R. (1999). *Discrete-Time Signal Processing*. Garden City, NY: Prentice-Hall.
- Ostwald, J. (1984). Tonotopical organization and pure tone response characteristics of single units in the auditory cortex of the greater horseshoe bat. *J. Comp. Physiol. A* **155**, 821-834.
- Pavey, C. R. and Burwell, C. J. (1998). Bat predation on eared moths: a test of the allotonic frequency hypothesis. *Oikos* **81**, 143-151.
- Pollak, G., Henson, O. W., Jr and Novick, A. (1972). Cochlear microphonic audiograms in the 'pure tone' bat *Chilonycteris parnellii parnellii*. *Science* **176**, 66-68.
- Pollak, G., Henson, O. W., Jr and Johnson, R. (1979). Multiple specializations in the peripheral auditory system of the CF-FM bat, *Pteronotus parnellii*. *J. Comp. Physiol. A* **131**, 255-266.
- Pollak, G. D. and Casseday, J. H. (1989). *The Neural Basis of Echolocation in Bats*. Berlin, Germany: Springer-Verlag.
- Portfors, C. V. and Wenstrup, J. J. (1999). Delay-tuned neurons in the inferior colliculus of the mustached bat: implications for analyses of target distance. *J. Neurophysiol.* **82**, 1326-1338.
- Pye, J. D. (1960). A theory of echolocation by bats. *J. Laryngol. Otol.* **74**, 718-729.
- Pye, J. D. (1961). Perception of distance in animal echolocation. *Nature* **190**, 362-363.
- Pye, J. D. and Roberts, L. H. (1970). Ear movements in a hipposiderid bat. *Nature* **225**, 285-286.
- Roverud, R. C. and Grinnell, A. D. (1985). Frequency tracking and Doppler shift compensation in response to an artificial CF/FM echolocation sound in the CF/FM bat, *Noctilio albigentris*. *J. Comp. Physiol. A* **156**, 471-475.
- Rübtsamen, R., Neuweiler, G. and Sripathi, K. (1988). Comparative collicular tonotopy in two bat species adapted to movement detection, *Hipposideros speoris* and *Megaderma lyra*. *J. Comp. Physiol. A* **163**, 271-285.
- Sayegh, R., Aubile, B. and Faure, P. A. (2011). Duration tuning in the auditory midbrain of echolocating and non-echolocating vertebrates. *J. Comp. Physiol. A* **197**, 571-583.
- Schmieder, D. A., Kingston, T., Hashim, R. and Siemers, B. M. (2010). Breaking the trade-off: rainforest bats maximize bandwidth and repetition rate of echolocation calls as they approach prey. *Biol. Lett.* **6**, 604-609.
- Schnitzler, H.-U. (1968). Die Ultraschall-Ortungslaute der Hufeisen-Fledermäuse (Chiroptera-Rhinolophidae) in verschiedenen Orientierungssituationen. *Zeitschrift für vergleichende Physiologie* **57**, 376-408.
- Schnitzler, H.-U. (1970). Echoortung bei der Fledermaus *Chilonycteris rubiginosa*. *Zeitschrift für vergleichende Physiologie* **68**, 25-38.
- Schnitzler, H.-U. (1973). Control of Doppler shift compensation in the greater horseshoe bat, *Rhinolophus ferrumequinum*. *J. Comp. Physiol. A* **82**, 79-92.
- Schnitzler, H.-U. (1987). Echoes of fluttering insects: information for echolocating bats. In *Recent Advances in the Study of Bats* (ed. M. B. Fenton, P. A. Racey and J. M. V. Rayner), pp. 226-243. Cambridge, UK: Cambridge University Press.
- Schnitzler, H.-U. and Denzinger, A. (2011). Auditory fovea and Doppler shift compensation: adaptations for flutter detection in echolocating bats using CF-FM signals. *J. Comp. Physiol. A* **197**, 541-559.
- Schnitzler, H.-U., Menne, D., Kober, R. and Heblisch, K. (1983). The acoustical image of fluttering insects in echolocating bats. In *Neuroethology and Behavioral Physiology* (ed. F. Huber and H. Markl), pp. 235-250. Berlin, Germany: Springer.

- Schnitzler, H.-U., Hackbarth, H., Heilmann, U. and Herbert, H.** (1985). Echolocation behavior of rufous horseshoe bats hunting for insects in flycatcher-style. *J. Comp. Physiol. A* **157**, 39-46.
- Schnitzler, H.-U., Kalko, E. K. V., Kaipf, I. and Grinnell, A. D.** (1994). Foraging and echolocation behavior of the greater bulldog bat, *Noctilio leporinus*, in the field. *Behav. Ecol. Sociobiol.* **35**, 327-345.
- Schnitzler, H.-U., Kalko, E. K. V. and Denzinger, A.** (2004). Evolution of echolocation and foraging behavior in bats. In *Echolocation in Bats and Dolphins*. (ed. J. A. Thomas, C. F. Moss and M. Vater), pp. 331-339. Chicago, IL: University of Chicago Press.
- Schuller, G.** (1974). The role of overlap of echo with outgoing echolocation sound in the bat *Rhinolophus ferrumequinum*. *Naturwissenschaften* **61**, 171-172.
- Schuller, G.** (1977). Echo delay and overlap with emitted orientation sounds and Doppler-shift compensation in the bat, *Rhinolophus ferrumequinum*. *J. Comp. Physiol. A* **114**, 103-114.
- Schuller, G.** (1980). Hearing characteristics and Doppler shift compensation in south Indian CF-FM bats. *J. Comp. Physiol. A* **139**, 349-356.
- Schuller, G.** (1984). Natural ultrasonic echoes from wing beating insects are encoded by collicular neurons in the CF-FM bat, *Rhinolophus ferrumequinum*. *J. Comp. Physiol. A* **155**, 121-128.
- Schuller, G. and Pollack, G.** (1979). Disproportionate frequency representation in the inferior colliculus of Doppler-compensating greater horseshoe bats: evidence of an acoustic fovea. *J. Comp. Physiol. A* **132**, 47-54.
- Schuller, G., O'Neill, W. E. and Radtke-Schuller, S.** (1991). Facilitation and delay sensitivity of auditory cortex neurons in CF-FM bats, *Rhinolophus rouxi* and *Pteronotus p. pamellii*. *Eur. J. Neurosci.* **3**, 1165-1181.
- Simmons, J. A.** (1980). Phylogenetic adaptations and the evolution of echolocation in bats (Chiroptera). In *Proceedings of the Fifth International Bat Research Conference* (ed. D. E. Wilson and A. L. Gardner), pp. 267-278. Lubbock, TX: Texas Tech University Press.
- Simmons, J. A. and Stein, R. A.** (1980). Acoustic imaging in bat sonar: echolocation signals and the evolution of echolocation. *J. Comp. Physiol. A* **135**, 61-84.
- Simmons, J. A., Fenton, M. B. and O'Farrell, M. J.** (1979). Echolocation and pursuit of prey by bats. *Science* **203**, 16-21.
- Simmons, N. B. and Geisler, J. H.** (1998). Phylogenetic relationships of Icaronycteris, Archaeonycteris, Hassianycteris, and Palaeochiropteryx to extant bat lineages in Microchiroptera. *Bull. Am. Mus. Nat. Hist.* **235**, 1-182.
- Simmons, N. B., Seymour, K. L., Habersetzer, J. and Gunnell, G. F.** (2008). Primitive early Eocene bat from Wyoming and the evolution of flight and echolocation. *Nature* **451**, 818-821.
- Simmons, N. B., Seymour, K. L., Habersetzer, J. and Gunnell, G. F.** (2010). Inferring echolocation in ancient bats. *Nature* **466**, E8.
- Smotherman, M. and Guillén-Servent, A.** (2008). Doppler-shift compensation behavior by Wagner's Mustached bat, *Pteronotus personatus*. *J. Acoust. Soc. Am.* **123**, 4331-4339.
- Speakman, J. R.** (2001). The evolution of flight and echolocation in bats: another leap in the dark. *Mammal Rev.* **31**, 111-130.
- Speakman, J. R. and Racey, P. A.** (1991). No cost of echolocation for bats in flight. *Nature* **350**, 421-423.
- Suga, N. and Jen, P. H.-S.** (1976). Disproportionate tonotopic representation for processing CF-FM sonar signals in the mustache bat auditory cortex. *Science* **194**, 542-544.
- Suga, N. and Jen, P. H.-S.** (1977). Further studies on the peripheral auditory system of 'CF-FM' bats specialized for fine frequency analysis of Doppler-shifted echoes. *J. Exp. Biol.* **69**, 207-232.
- Suga, N. and Schlegel, P.** (1972). Neural attenuation of responses to emitted sounds in echolocating bats. *Science* **177**, 82-84.
- Suga, N., Neuweiler, G. and Möller, J.** (1976). Peripheral auditory tuning for fine frequency analysis by the CF-FM bat, *Rhinolophus ferrumequinum*. *J. Comp. Physiol.* **106**, 111-125.
- Sullivan, W. E.** (1982). Neuronal representation of target distance in auditory cortex of the echolocating bat *Myotis lucifugus*. *J. Neurophysiol.* **48**, 1011-1032.
- Sum, Y. W. and Menne, D.** (1988). Discrimination of fluttering targets by the FM-bat *Pipistrellus stenopterus*? *J. Comp. Physiol. A* **163**, 349-354.
- Surlykke, A. and Kalko, E. K. V.** (2008). Echolocating bats cry out loud to detect their prey. *PLoS ONE* **3**, e2036.
- Surlykke, A. and Moss, C. F.** (2000). Echolocation behaviour of big brown bats, *Eptesicus fuscus*, in the field and the laboratory. *J. Acoust. Soc. Am.* **108**, 2419-2429.
- Surlykke, A., Boel Pedersen, S. and Jakobsen, L.** (2009). Echolocating bats emit a highly directional sonar sound beam in the field. *Proc. Biol. Sci.* **276**, 853-860.
- Teeling, E. C.** (2009). Hear, hear: the convergent evolution of echolocation in bats? *Trends Ecol. Evol.* **24**, 351-354.
- Thomas, J. A., Moss, C. F. and Vater, M. (ed.)** (2002). *Echolocation in Bats and Dolphins*. Chicago, IL: University of Chicago Press.
- Trappe, M. and Schnitzler, H.-U.** (1982). Doppler-shift compensation in insect-catching horseshoe bats. *Naturwissenschaften* **69**, 193-194.
- Vater, M.** (1981). Single unit responses to linear frequency-modulations in the inferior colliculus of the greater horseshoe bat, *Rhinolophus ferrumequinum*. *J. Comp. Physiol. A* **141**, 249-264.
- Vater, M.** (1982). Single unit responses in cochlear nucleus of horseshoe bats to sinusoidal frequency and amplitude modulated signals. *J. Comp. Physiol. A* **149**, 369-388.
- Vater, M. and Siefer, W.** (1995). The cochlea of *Tadarida brasiliensis*: specialized functional organization in a generalized bat. *Hear. Res.* **91**, 178-195.
- Vaughan, T. A.** (1977). Foraging behaviour of the giant leaf-nosed bat (*Hipposideros commersoni*). *East African Wildlife Journal* **15**, 237-249.
- Veselka, N., McErlain, D. D., Holdsworth, D. W., Eger, J. L., Chhem, R. K., Mason, M. J., Brain, K. L., Faure, P. A. and Fenton, M. B.** (2010a). A bony connection signals laryngeal echolocation in bats. *Nature* **463**, 939-942.
- Veselka, N., McErlain, D. D., Holdsworth, D. W., Eger, J. L., Chhem, R. K., Mason, M. J., Brain, K. L., Faure, P. A. and Fenton, M. B.** (2010b). Veselka et al. reply. *Nature* **466**, E9.
- Vogler, B. and Neuweiler, G.** (1983). Echolocation in the noctule (*Nyctalus noctula*) and horseshoe bat (*Rhinolophus ferrumequinum*). *J. Comp. Physiol. A* **152**, 421-432.
- von der Emde, G. and Menne, D.** (1989). Discrimination of insect wingbeat-frequencies by the bat *Rhinolophus ferrumequinum*. *J. Comp. Physiol. A* **164**, 663-671.
- Wenstrup, J. J.** (1984). Auditory sensitivity in the fish-catching bat, *Noctilio leporinus*. *J. Comp. Physiol. A* **155**, 91-101.
- Wenstrup, J. J. and Suthers, R. A.** (1984). Echolocation of moving targets by the fish-catching bat, *Noctilio leporinus*. *J. Comp. Physiol. A* **155**, 75-89.
- Yan, J. and Suga, N.** (1996). The midbrain creates and the thalamus sharpens echo-delay tuning for the cortical representation of target-distance information in the mustached bat. *Hear. Res.* **93**, 102-110.
- Yovel, Y., Falk, B., Moss, C. F. and Ulanovsky, N.** (2010). Optimal localization by pointing off axis. *Science* **327**, 701-704.
